# Supplementary material for: Ubiquitous overexpression of the DNA repair factor dPrp19 reduces DNA damage and extends Drosophila life span
Source: PubMed Central journal article supplement — NPJ Aging Mech Dis. 2017 Mar 15;3:5. doi: 10.1038/s41514-017-0005-z (PMC5445577; doi:10.1038/s41514-017-0005-z), 2017-03-15

**Supplementary Table 1.** Effect of RU486 on female life span in *dPrp19* overexpression and control genotypes.

| Genotype                                                 | RU [ $\mu\text{g/ml}$ ] | N(0) | Mean lifespan (d) | SE   | Median | log-rank $\chi^2$ |          |            |
|----------------------------------------------------------|-------------------------|------|-------------------|------|--------|-------------------|----------|------------|
|                                                          |                         |      |                   |      |        | 0 vs 100          | 0 vs 300 | 100 vs 300 |
| <i>daGS-Gal4; w<sup>1118</sup></i><br>(control genotype) | 0                       | 131  | 65.20             | 1.23 | 72     | 0.98              | 0.65     | 2.61       |
|                                                          | 100                     | 138  | 64.04             | 1.42 | 69     |                   |          |            |
|                                                          | 300                     | 140  | 66.12             | 0.98 | 69     |                   |          |            |
| <i>TubGS-Gal4 &gt; UAS-dPrp19-1</i>                      | 0                       | 85   | 96.73             | 1.29 | 98     | 5.84*             | 66.88**  | 23.2**     |
|                                                          | 100                     | 41   | 100.18            | 1.21 | 101    |                   |          |            |
|                                                          | 300                     | 82   | 105.98            | 1.51 | 109    |                   |          |            |
| <i>daGS-Gal4 &gt; UAS-dPrp19-2</i>                       | 0                       | 132  | 50.73             | 1.25 | 55     | 43.02**           | 116.85** | 11.35**    |
|                                                          | 100                     | 137  | 58.20             | 1.30 | 61     |                   |          |            |
|                                                          | 300                     | 115  | 63.65             | 1.27 | 65     |                   |          |            |
| <i>daGS-Gal4 &gt; UAS-dPrp19-4</i>                       | 0                       | 142  | 52.19             | 0.64 | 53     | 100.26**          | 106.39** | 10.03*     |
|                                                          | 100                     | 139  | 60.19             | 0.83 | 62     |                   |          |            |
|                                                          | 300                     | 65   | 62.70             | 1.55 | 66     |                   |          |            |

**Supplementary Table 2.** Effect of RU486 on male life span in *dPrp19* overexpression and control genotypes.

| Genotype                                                 | RU [ $\mu\text{g/ml}$ ] | N(0) | Mean lifespan (d) | SE   | Median | log-rank $\chi^2$ |          |            |
|----------------------------------------------------------|-------------------------|------|-------------------|------|--------|-------------------|----------|------------|
|                                                          |                         |      |                   |      |        | 0 vs 100          | 0 vs 300 | 100 vs 300 |
| <i>daGS-Gal4; w<sup>1118</sup></i><br>(control genotype) | 0                       | 136  | 70.02             | 1.01 | 73     | 2.90              | 5.25     | 0.64       |
|                                                          | 100                     | 127  | 68.64             | 0.99 | 72     |                   |          |            |
|                                                          | 300                     | 125  | 65.33             | 1.44 | 70     |                   |          |            |
| <i>daGS-Gal4 &gt; UAS-</i><br><i>dPrp19-2</i>            | 0                       | 138  | 63.73             | 1.82 | 70     | 7.89*             | 0.74     | 3.42       |
|                                                          | 100                     | 141  | 57.79             | 2.09 | 69     |                   |          |            |
|                                                          | 300                     | 137  | 63.29             | 1.81 | 70     |                   |          |            |
| <i>daGS-Gal4 &gt; UAS-</i><br><i>dPrp19-4</i>            | 0                       | 122  | 69.63             | 1.26 | 72     | 3.11              | 0.16     | 3.30       |
|                                                          | 100                     | 136  | 72.38             | 0.99 | 74     |                   |          |            |
|                                                          | 300                     | 61   | 68.58             | 1.78 | 72     |                   |          |            |

**Supplementary Table 3.** Effects of *dPrp19* overexpression and control genotypes on female survival upon exposure to paraquat (20 mM).

| Genotype                            | RU [ $\mu\text{g/ml}$ ] | N(0) | Mean lifespan (h) | SE   | Median | log-rank $\chi^2$ |          |            |
|-------------------------------------|-------------------------|------|-------------------|------|--------|-------------------|----------|------------|
|                                     |                         |      |                   |      |        | 0 vs 100          | 0 vs 300 | 100 vs 300 |
| <i>TubGS-Gal4 &gt; UAS-dPrp19-1</i> | 0                       | 109  | 91.38             | 3.61 | 96     | 6.18*             | 10.46*   | 2.18       |
|                                     | 100                     | 162  | 106.96            | 2.40 | 120    |                   |          |            |
|                                     | 300                     | 86   | 112.74            | 3.15 | 120    |                   |          |            |

**Supplementary Table 4.** Effects of *dPrp19* overexpression on female survival upon exposure to cisplatin (400 µg/ml).

| Genotype                                                 | RU [µg/ml] | N(0) | Mean lifespan (h) | SE   | Median | log-rank $\chi^2$ |          |            |
|----------------------------------------------------------|------------|------|-------------------|------|--------|-------------------|----------|------------|
|                                                          |            |      |                   |      |        | 0 vs 100          | 0 vs 300 | 100 vs 300 |
| <i>daGS-Gal4; w<sup>1118</sup></i><br>(control genotype) | 0          | 195  | 102.77            | 1.09 | 108    | 3.4               | 2.2      | 0.28       |
|                                                          | 100        | 200  | 105.42            | 1.14 | 108    |                   |          |            |
|                                                          | 300        | 198  | 105.52            | 1.01 | 108    |                   |          |            |
| <i>daGS-Gal4 &gt;</i><br><i>dPrp19-2</i>                 | 0          | 206  | 107.77            | 1.48 | 108    | 5.73              | 11.58**  | 1.58       |
|                                                          | 100        | 199  | 114.21            | 1.28 | 108    |                   |          |            |
|                                                          | 300        | 197  | 116.35            | 1.46 | 120    |                   |          |            |
| Genotype                                                 |            | N(0) | Mean lifespan (h) | SE   | Median | log-rank $\chi^2$ |          |            |
| <i>TubGal4 &gt; dPrp19-2</i>                             |            | 100  | 104.88            | 1.63 | 108    |                   |          |            |
| <i>TM6/Sb; dPrp19-2</i><br>(control genotype)            |            | 83   | 89.20             | 1.49 | 84     |                   | 52.21**  |            |
| <i>TubGal4 &gt; dPrp19-4</i>                             |            | 99   | 83.88             | 1.25 | 84     |                   |          |            |
| <i>TM6/Sb; dPrp19-4</i><br>(control genotype)            |            | 99   | 72.61             | 0.98 | 72     |                   | 47.85**  |            |

**Supplementary Figure 1.** *dPrp19* expression increases life span in females but not males. This figure represents the survival data from Figure 2, re-plotted in terms of mean life span ( $\pm$  SD) as a function of RU486 concentration. **(a)** Response to induction of *dPrp19* expression in female *TubGS-Gal4 > UAS-dPrp19-1*. **(b,c)** Response to induction of *dPrp19* expression in female **(b)** and male **(c)** flies of *daGS-Gal4 > dPrp19-2*. In males, the small but significant difference in mean life span under treatment of 100  $\mu$ g/ml RU486 is likely due to "setup mortality". **(d,e)** Response to induction of *dPrp19* expression in female **(d)** and male **(e)** flies of *daGS-Gal4 > dPrp19-4*. See Supplementary Tables 1 (females) and 2 (males) for a summary of statistics, and Materials and Methods for experimental details.

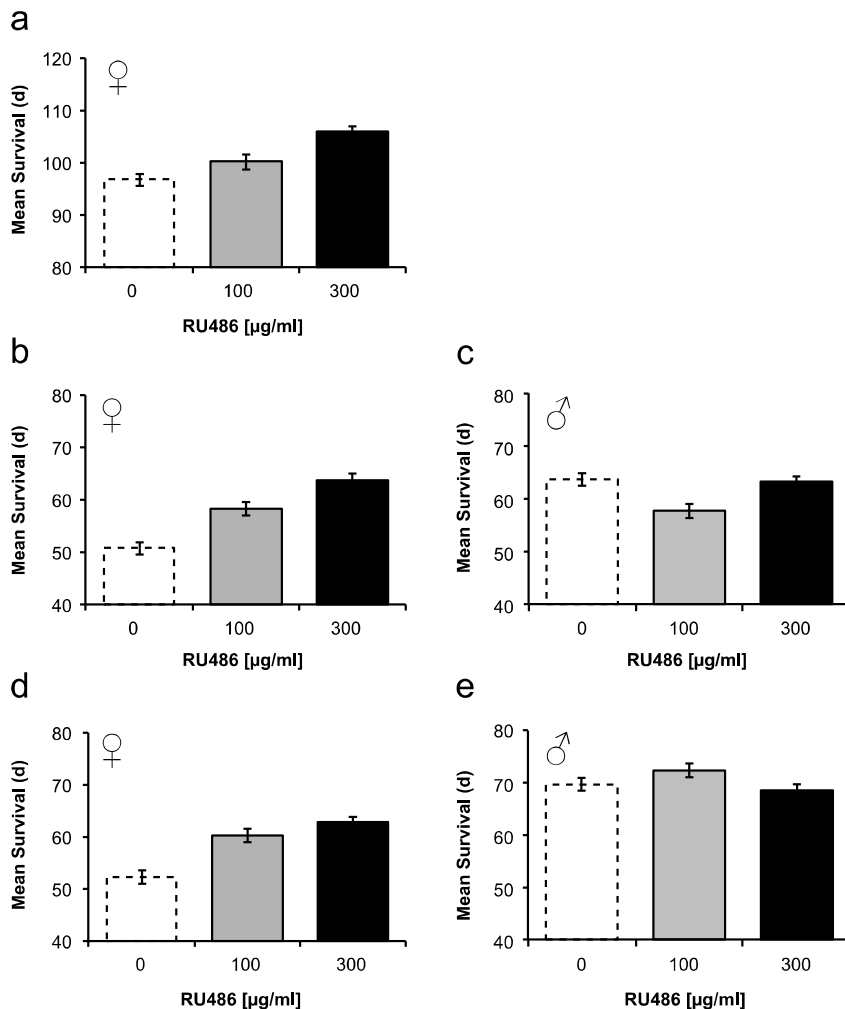

**Supplementary Figure 2.** In absence of the *dPrp19* UAS expression cassette, the inducer drug RU486 does not affect life span. To control for confounding effects of the inducer drug RU486 on survival, we crossed the *daGS-Gal4* driver to the *w<sup>1118</sup>* strain. Neither in female (**a-c**) nor male (**d-f**) flies of the resulting F1 cross (*daGS-Gal4; w<sup>1118</sup>*), we observed an effect of RU486 on *dPrp19* expression (**b,e**) or life span (**a,c,d,f**) (Supplementary Tables 1 and 2).

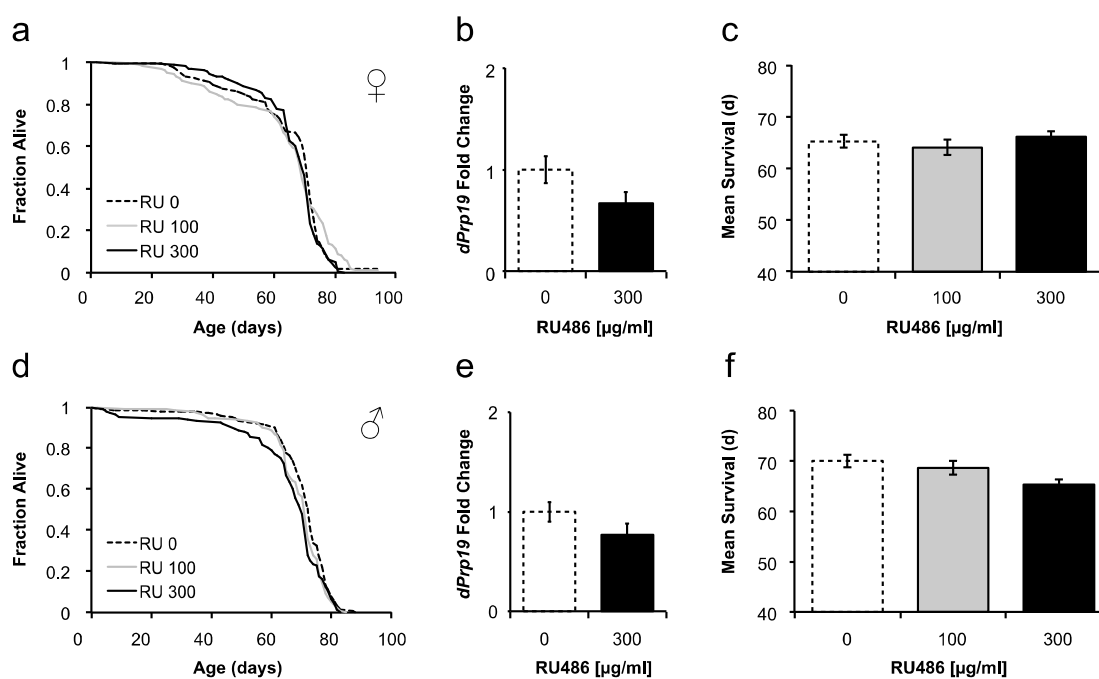

**Supplementary Figure 3.** Overexpression of *dPrp19* promotes resistance to genotoxic agents in female flies. **(a)** Mean life span ( $\pm$  SD) of females (*TubGS-Gal4 > UAS-dPrp19-1*) at different RU486 concentrations and when exposed to 20mM paraquat (PQ). This plot corresponds to the survival curve in Figure 4a. **(b)** Mean life span ( $\pm$  SD) of females (*daGS-Gal4 > UAS-dPrp19-2*) at different RU486 concentrations when exposed to 400  $\mu$ g/ml cisplatin (CisPt). This plot corresponds to the survival curve in Figure 4b. **(c)** Mean life span ( $\pm$  SD) of females with constitutively active *dPrp19* expression (T2: *Tub-Gal4 > UAS-dPrp19-2* in grey; T4: *Tub-Gal4 > UAS-dPrp19-4* in black) and their controls (C2: TM6 *Sb*; *UAS-dPrp19-2*, in dashed grey; C4: TM6 *Sb*; *UAS-dPrp19-4*) when exposed to 400  $\mu$ g/ml cisplatin (CisPt). This plot corresponds to the survival curve in Figure 4c. **(d, e)**. In absence of the *dPrp19* UAS expression cassette, RU486 does not affect resistance to cisplatin. In F1 offspring carrying only the driver (*daGS-Gal4*; *w<sup>1118</sup>*) we did not observe any effect of RU486 on resistance to genotoxic stress induced by 400  $\mu$ g/ml cisplatin. See Supplementary Tables 3 (paraquat) and 4 (cisplatin) for statistics.

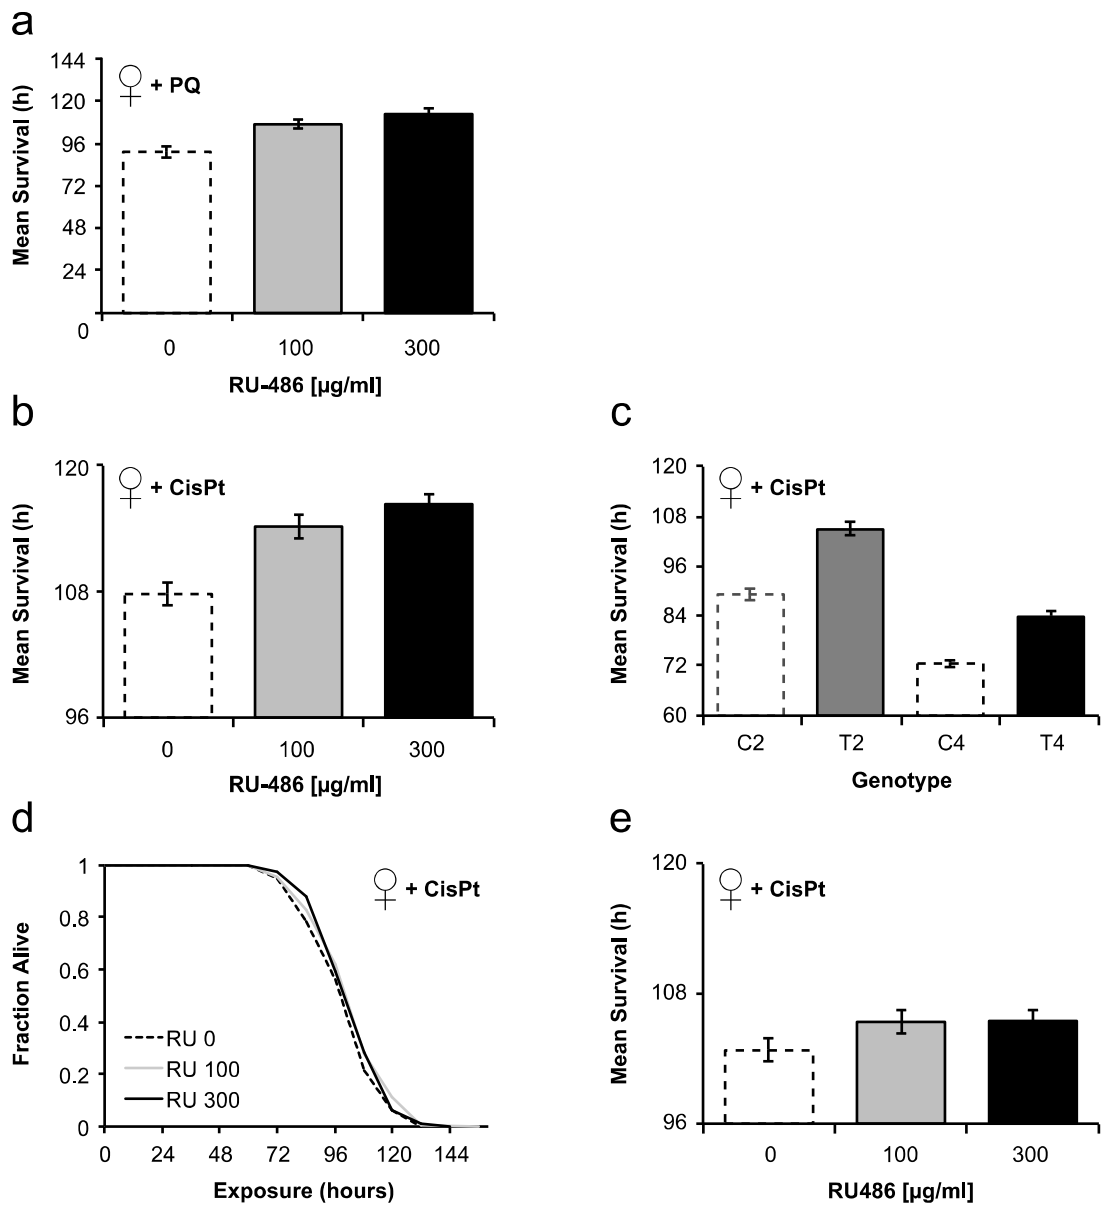

Supplement: 41514_2017_5_MOESM1_ESM.pdf [file 41514_2017_5_MOESM1_ESM.pdf]
